# Supplementary material for: Pan-cancer analysis of the TRAF family genes and their correlation with prognosis, TME, immune and drug sensitivity
Source: Eur J Med Res. 2024 Jun 2;29:307. doi: 10.1186/s40001-024-01875-8 (PMC11145793; doi:10.1186/s40001-024-01875-8)
Supplement: Supplementary file 3 — Supplementary Material 3: Table S1: Detailed information on 33 cancers. [file 40001_2024_1875_MOESM3_ESM.xlsx]

## Sheet: Sheet1
Table S1. Detailed information on 33 cancers.
Abbreviation	Full name	Number of normal samples	Number of cancer samples
ACC	Adrenocortical carcinoma	0	79
BLCA	Bladder Urothelial Carcinoma	19	411
BRCA	Breast invasive carcinoma	113	1104
CESC	Cervical squamous cell carcinoma and endocervical adenocarcinoma	3	306
CHOL	Cholangiocarcinoma	9	36
COAD	Colon adenocarcinoma	41	471
DLBC	Lymphoid Neoplasm Diffuse Large B-cell Lymphoma	0	48
ESCA	Esophageal carcinoma	11	162
GBM	Glioblastoma multiforme	5	168
HNSC	Head and Neck squamous cell carcinoma	44	502
KICH	Kidney Chromophobe	24	65
KIRC	Kidney renal clear cell carcinoma	72	535
KIRP	Kidney renal papillary cell carcinoma	32	289
LAML	Acute Myeloid Leukemia	0	151
LGG	Brain Lower Grade Glioma	0	529
LIHC	Liver hepatocellular carcinoma	50	374
LUAD	Lung adenocarcinoma	59	526
LUSC	Lung squamous cell carcinoma	49	501
MESO	Mesothelioma	0	86
OV	Ovarian serous cystadenocarcinoma	0	379
PAAD	Pancreatic adenocarcinoma	4	178
PCPG	Pheochromocytoma and Paraganglioma	3	183
PRAD	Prostate adenocarcinoma	52	499
READ	Rectum adenocarcinoma	10	167
SARC	Sarcoma	2	263
SKCM	Skin Cutaneous Melanoma	1	471
STAD	Stomach adenocarcinoma	32	375
TGCT	Testicular Germ Cell Tumors	0	156
THCA	Thyroid carcinoma	58	510
THYM	Thymoma	2	119
UCEC	Uterine Corpus Endometrial Carcinoma	35	548
UCS	Uterine Carcinosarcoma	0	56
UVM	Uveal Melanoma	0	80
		730	10327
