# Supplementary material for: Pan-cancer analysis of the TRAF family genes and their correlation with prognosis, TME, immune and drug sensitivity
Source: Eur J Med Res. 2024 Jun 2;29:307. doi: 10.1186/s40001-024-01875-8 (PMC11145793; doi:10.1186/s40001-024-01875-8)
Supplement: Supplementary file 4 — Supplementary Material 4: Table S2: TRAF family gene expression was related to the prognosis of different cancers in PrognoScan. [file 40001_2024_1875_MOESM4_ESM.xlsx]

## Sheet: Sheet2
Table S2. TRAF family gene expression was related to the prognosis of different cancers in PrognoScan.
Gene	Dataset	cancertype	Endpoint	Number	COXP-value	HR	95%CI(low-high)
TRAF1	GSE2034	Breast cancer	DMFS	286	0.018033	0.59	0.38-0.91
	GSE12417-GPL570	Blood cancer	OS	79	0.039794	0.34	0.12-0.95
	GSE13213	Lung cancer	OS	117	0.040834	0.68	0.47-0.98
TRAF2	GSE7378	Breast cancer	DFS	54	0.004432	28.09	2.82-279.47
	GSE13507	Bladder cancer	DSS	165	0.019289	1.9	1.11-3.26
	GSE16581	Brain cancer	OS	67	0.007671	124.25	3.59-4304.01
	GSE9893	Breast cancer	OS	155	0.001042	1.3	1.11-1.53
	GSE8841	Ovarian cancer	OS	81	0.010811	4.49	1.41-14.25
	GSE9195	Breast cancer	RFS	77	0.029167	6.08	1.20-30.77
TRAF3	GSE9195	Breast cancer	DMFS	77	0.030905	12.41	1.26-122.20
	GSE30929	Soft tissue cancer	DRFS	140	0.033339	0.56	0.33-0.96
	GSE3494-GPL96	Breast cancer	DSS	236	0.006688	0.4	0.21-0.78
	GSE4271-GPL96	Brain cancer	OS	77	0.001105	0.33	0.17-0.64
	GSE16581	Brain cancer	OS	67	0.006412	118.05	3.82-3646.63
	GSE3143	Breast cancer	OS	158	0.003566	2.14	1.28-3.58
TRAF4	GSE4922-GPL97	Breast cancer	DFS	249	2.7e-05	3.11	1.83-5.29
	GSE30929	Soft tissue cancer	DRFS	140	0.008092	4.76	1.50-15.08
	GSE1456-GPL96	Breast cancer	DSS	159	0.002768	2.72	1.41-5.23
	GSE1456-GPL96	Breast cancer	DSS	159	0.031184	1.85	1.06-3.24
	GSE3494-GPL97	Breast cancer	DSS	236	0.04894	1.68	1.00-2.81
	GSE14814	Lung cancer	DSS	90	0.011138	3.84	1.36-10.87
	GSE12417-GPL96	Blood cancer	OS	163	0.00234	1.57	1.17-2.10
	GSE12417-GPL97	Blood cancer	OS	163	0.000142	2.94	1.69-5.11
	GSE12417-GPL97	Blood cancer	OS	163	0.026488	3.03	1.14-8.09
	GSE9893	Breast cancer	OS	155	0.000379	1.86	1.32-2.61
	GSE1456-GPL96	Breast cancer	OS	159	0.028814	1.97	1.07-3.62
	GSE1456-GPL96	Breast cancer	OS	159	0.014674	1.81	1.12-2.92
	GSE19234	Skin cancer	OS	38	0.005068	2.75	1.36-5.58
	GSE12276	Breast cancer	RFS	204	0.00135	1.43	1.15-1.78
TRAF5	GSE12417-GPL96	Blood cancer	OS	163	0.007768	1.36	1.09-1.71
	GSE4271-GPL96	Brain cancer	OS	77	0.00018	2.53	1.56-4.12
	GSE4412-GPL96	Brain cancer	OS	74	0.018554	2.01	1.12-3.59
	GSE13213	Lung cancer	OS	117	0.049314	0.67	0.45-1.00
	GSE9891	Ovarian cancer	OS	278	0.013166	1.33	1.06-1.67
	GSE12276	Breast cancer	RFS	204	0.015551	0.73	0.57-0.94
TRAF6	GSE13507	Bladder cancer	OS	165	0.02933	0.33	0.12-0.89
	GSE17710	Lung cancer	OS	56	0.036375	0.41	0.18-0.95
TRAF7	GSE4922-GPL97	Breast cancer	DFS	249	0.022799	1.65	1.07-2.54
	GSE3494-GPL97	Breast cancer	DSS	236	0.01616	1.92	1.13-3.26
	GSE13213	Lung cancer	OS	117	0.000326	2.57	1.54-4.31
	GSE31210	Lung cancer	RFS	204	0.013886	3.64	1.30-10.20
Notably, TRAF1 was found to be protective against Breast (DMFS), Blood (OS), and Lung (OS) cancers. TRAF2 played a detrimental prognostic factor in the Breast (DFS, RFS, OS), Brain (OS), Bladder (DSS), and Ovarian (OS) cansers. TRAF3 played a detrimental prognostic factor in the Breast (DMFS, OS) and Brain (OS) cansers. In contrast, TRAF3 was found to be protective against Breast (DSS), Brain (OS…
