# Supplementary material for: Pan-cancer analysis of the TRAF family genes and their correlation with prognosis, TME, immune and drug sensitivity
Source: Eur J Med Res. 2024 Jun 2;29:307. doi: 10.1186/s40001-024-01875-8 (PMC11145793; doi:10.1186/s40001-024-01875-8)
Supplement: Supplementary file 5 — Supplementary material 5: Table S3: Correlation coefficients and p values for the association between TRAF family and ESTIMATE scores, RNAss, and DNAss. [file 40001_2024_1875_MOESM5_ESM.xlsx]

## Sheet: estimateCor.cor
CancerType	TRAF1	TRAF2	TRAF3	TRAF4	TRAF5	TRAF6	TRAF7
ACC	-0.117527	-0.0481986	0.251923	0.358593	0.133934	0.161173	0.279479
BLCA	-0.549263	-0.252739	-0.203272	0.420142	-0.13919	0.0153409	0.0469912
BRCA	-0.604065	0.00281749	-0.0924319	0.241102	-0.00308053	-0.0252851	0.187503
CESC	-0.582084	-0.23077	0.0216152	0.15378	0.0721473	0.15076	0.128541
CHOL	-0.346718	-0.140541	-0.425483	0.246075	-0.0326898	-0.175032	0.0365508
COAD	-0.412919	0.106853	-0.316672	0.307051	0.225404	-0.205316	-0.0428109
DLBC	-0.31904	0.194312	-0.245658	0.448328	0.0814155	-0.38439	-0.0156318
ESCA	-0.628351	-0.095996	-0.0736182	0.25043	-0.174685	-0.109739	0.25058
GBM	-0.141746	0.231275	0.095163	0.4686	0.0377681	0.134667	0.355617
HNSC	-0.610101	-0.099513	0.0545317	0.211117	-0.348221	-0.0480269	0.170559
KICH	-0.23361	-0.0663024	-0.0675699	-0.320586	-0.570586	-0.0702797	-0.204939
KIRC	-0.405306	-0.0889974	-0.172784	0.136911	-0.422575	0.0623226	-0.155418
KIRP	0.040905	-0.104156	-0.184492	0.153289	-0.00491091	0.0976972	0.181197
LAML	-0.42947	0.268811	-0.159683	0.159205	0.105305	-0.0649425	-0.000237016
LGG	-0.207843	-0.105874	0.287297	0.124003	0.000978658	-0.0615669	-0.313414
LIHC	-0.253899	0.0334859	-0.235933	0.161574	-0.281664	0.0460026	0.0702523
LUAD	-0.58863	0.220016	-0.260858	0.395573	-0.178159	-0.185148	0.146814
LUSC	-0.493782	-0.0290816	0.0145415	0.263667	-0.202059	0.0507259	0.140537
MESO	-0.397387	-0.33795	-0.0551818	0.0377282	0.0782207	0.0651446	0.332704
OV	-0.475937	-0.132537	-0.0620119	0.0350573	0.0577572	-0.0390689	0.00878295
PAAD	-0.597912	0.275835	-0.163347	0.518566	-0.184004	-0.124793	0.278282
PCPG	-0.11362	-0.0889068	0.146464	-0.415295	-0.0764688	0.121678	-0.112015
PRAD	-0.509357	-0.104068	-0.210491	0.239112	-0.536127	-0.231572	0.269426
READ	-0.44222	0.0624259	-0.0336685	0.0637529	0.242309	-0.0753141	0.0312207
SARC	-0.231965	-0.208361	0.00559458	0.296393	0.329058	0.228385	0.19604
SKCM	-0.488105	-0.189852	-0.150679	0.331359	-0.0144975	0.113906	0.282997
STAD	-0.656674	0.0928176	-0.267898	0.498806	-0.104089	-0.184383	0.142197
TGCT	-0.825437	-0.159451	-0.277325	0.33072	-0.426413	-0.067557	0.179365
THCA	-0.596599	-0.0601347	0.0103717	0.0720553	-0.604815	0.259404	0.0511587
THYM	-0.373465	-0.0800171	-0.0444808	-0.0265418	-0.294616	0.101731	0.0765204
UCEC	-0.586313	-0.135456	-0.0116584	0.165313	-0.049497	0.0742889	0.0871494
UCS	-0.08838	0.0922078	0.279084	0.179904	0.217772	-0.227204	0.279494
UVM	-0.151031	-0.249133	-0.283169	0.124379	-0.126676	-0.111111	0.134763

## Sheet: estimateCor.pval
CancerType	TRAF1	TRAF2	TRAF3	TRAF4	TRAF5	TRAF6	TRAF7
ACC	0.301624	0.672557	0.0253605	0.00125553	0.238756	0.155632	0.0128541
BLCA	0	2.28155e-07	3.42454e-05	0	0.00472939	0.756401	0.341821
BRCA	0	0.925487	0.00211769	5.69337e-16	0.918553	0.401231	3.69342e-10
CESC	0	4.8117e-05	0.706309	0.00708518	0.208073	0.00830402	0.0245919
CHOL	0.0389096	0.412142	0.0102249	0.147659	0.849681	0.305978	0.8321
COAD	0	0.0204091	2.5961e-12	1.23716e-11	8.25667e-07	7.38793e-06	0.353764
DLBC	0.0275375	0.185164	0.0924395	0.00154943	0.581163	0.00733247	0.915978
ESCA	0	0.224045	0.351471	0.00134927	0.0263105	0.164328	0.0013401
GBM	0.0668765	0.00261593	0.219571	2.16889e-10	0.626599	0.081801	2.62336e-06
HNSC	0	0.0258093	0.222509	1.92597e-06	1.14516e-15	0.282718	0.000125724
KICH	0.061265	0.598925	0.591943	0.00949478	1.1391e-06	0.577142	0.101463
KIRC	0	0.0396386	6.03344e-05	0.00151508	0	0.149952	0.000312987
KIRP	0.488296	0.0771055	0.00165922	0.00910846	0.933715	0.0973786	0.00201254
LAML	5.15669e-08	0.000879527	0.0502569	0.050955	0.19792	0.427797	0.99771
LGG	1.5031e-06	0.0148769	2.03291e-11	0.00430821	0.982079	0.157307	2.13414e-13
LIHC	7.11084e-07	0.518366	4.23913e-06	0.0017398	3.44303e-08	0.374835	0.175102
LUAD	0	3.70856e-07	1.44041e-09	0	4.08339e-05	1.99192e-05	0.000740344
LUSC	0	0.515921	0.745333	2.37072e-09	5.39457e-06	0.256994	0.00162821
MESO	0.000170972	0.00154537	0.613181	0.729713	0.473339	0.550534	0.00184218
OV	0	0.00983482	0.228316	0.496049	0.261887	0.448058	0.864615
PAAD	0	0.000204814	0.0294599	0	0.0140474	0.0969505	0.000178975
PCPG	0.125581	0.231135	0.0479523	7.04106e-09	0.303238	0.1008	0.131041
PRAD	0	0.0200981	2.21875e-06	7.05622e-08	0	1.82786e-07	1.11429e-09
READ	3.21577e-09	0.422488	0.66547	0.412678	0.00164986	0.333023	0.688475
SARC	0.000153135	0.000689648	0.928006	1.10961e-06	5.5955e-08	0.000194332	0.00142344
SKCM	0	3.47886e-05	0.00104951	2.11487e-13	0.753575	0.0134157	4.79318e-10
STAD	0	0.0726203	1.54996e-07	0	0.044002	0.000338675	0.0058438
TGCT	0	0.0468715	0.000478877	2.75349e-05	3.93044e-08	0.401645	0.0251809
THCA	0	0.175064	0.815189	0.104072	0	3.14899e-09	0.248717
THYM	3.27987e-05	0.386482	0.630523	0.774171	0.00119618	0.270526	0.407623
UCEC	0	0.00149376	0.785323	0.000103318	0.247285	0.0823021	0.0414426
UCS	0.516121	0.498052	0.037598	0.184103	0.106839	0.0922181	0.0373094
UVM	0.180774	0.0260931	0.0111468	0.271059	0.262253	0.325791	0.232814

## Sheet: RNAssCor.cor
CancerType	TRAF1	TRAF2	TRAF3	TRAF4	TRAF5	TRAF6	TRAF7
ACC	-0.250775	0.0887088	0.093944	0.276445	-0.0432858	-0.0680459	0.169969
BLCA	-0.265539	0.187215	0.0371961	0.254374	-0.254647	0.0585579	0.18692
BRCA	-0.171747	0.140653	-0.0157079	0.227699	-0.260545	-0.0748973	0.193064
CESC	-0.243956	0.126775	0.0194392	-0.0105588	-0.179652	-0.135655	0.0817811
CHOL	0.0393822	0.269241	-0.141828	-0.0893179	0.146976	-0.192021	0.102703
COAD	-0.366174	0.0867073	-0.131424	0.117451	0.0300651	-0.19252	-0.0391578
DLBC	-0.265523	0.16218	-0.25076	0.542662	-0.116804	-0.252822	0.123752
ESCA	-0.450563	0.238495	-0.0133394	0.389962	-0.0363354	-0.192611	0.257155
GBM	-0.344607	0.172315	-0.18109	0.534406	-0.161058	-0.173283	0.231237
HNSC	-0.170584	0.373314	0.0480043	0.337883	-0.084508	-0.0720276	0.0757083
KICH	-0.110531	-0.0232143	-0.237729	-0.221383	-0.374817	0.0605769	-0.187546
KIRC	-0.111886	0.0703499	-0.0890787	0.0490144	-0.247172	-0.148119	0.170508
KIRP	-0.479869	-0.245819	-0.278076	-0.206734	-0.348109	-0.198537	0.148363
LAML	-0.510502	0.0641198	-0.0181074	-0.202204	0.0630019	0.0552118	-0.0354787
LGG	-0.379202	-0.109934	0.22104	0.206661	-0.0927341	-0.00313289	-0.225109
LIHC	-0.210846	0.312545	-0.0865731	0.294707	-0.0442189	-0.254322	-0.036293
LUAD	-0.336835	0.208138	-0.145715	0.286469	-0.0978293	-0.254733	0.16663
LUSC	-0.310777	0.0716046	-0.0645036	0.394249	-0.167087	-0.0111926	0.135586
MESO	-0.0284636	0.126959	0.205642	0.166942	-0.280419	0.0175763	0.129714
OV	-0.309403	0.00808392	-0.112983	0.0033177	-0.159947	-0.0336414	-0.0591447
PAAD	-0.419715	0.340567	-0.169038	0.415223	-0.218972	-0.0804729	0.211209
PCPG	-0.142626	0.0430473	0.322879	-0.364684	-0.0827296	0.239118	-0.192036
PRAD	-0.456512	0.012807	-0.12518	0.385678	-0.51801	-0.215628	0.465253
READ	-0.453762	0.0652337	-0.0383999	0.104926	0.071483	-0.0690775	0.0566326
SARC	0.162989	0.400058	0.189028	0.154925	0.0260865	-0.0547888	0.292119
SKCM	-0.284309	0.162327	-0.0251848	0.0517924	0.157691	0.123813	0.289538
STAD	-0.35618	0.358966	-0.0549955	0.394232	-0.117651	-0.13192	0.225505
TGCT	-0.334759	0.151642	-0.666885	0.368509	-0.627134	-0.0773742	0.323238
THCA	-0.390204	0.103953	0.0650364	-0.187673	-0.403895	-0.00135181	0.0969913
THYM	-0.0119427	0.262164	-0.256851	-0.40799	0.173515	-0.30099	0.223266
UCEC	-0.346182	0.251993	0.0566151	0.0360863	-0.288782	-0.0651602	0.0287975
UCS	-0.18797	0.482912	0.254751	0.000820232	0.10663	-0.224334	0.214764
UVM	-0.19864	-0.157876	0.0479372	0.0338256	0.0184482	0.00187529	0.0935302

## Sheet: RNAssCor.pval
CancerType	TRAF1	TRAF2	TRAF3	TRAF4	TRAF5	TRAF6	TRAF7
ACC	0.0270439	0.439119	0.412504	0.0145307	0.706145	0.553128	0.136627
BLCA	6.76117e-08	0.000157798	0.455762	2.41267e-07	2.34048e-07	0.240138	0.000161668
BRCA	1.29675e-08	3.34877e-06	0.605044	3.65351e-14	3.40024e-18	0.0135717	1.53303e-10
CESC	1.86093e-05	0.0274042	0.735966	0.854683	0.0017154	0.0182121	0.155514
CHOL	0.819258	0.112294	0.407838	0.603204	0.390884	0.260814	0.549779
COAD	1.99021e-15	0.0685914	0.0056845	0.0135201	0.528265	4.76819e-05	0.411368
DLBC	0.0683876	0.269844	0.0857084	8.78696e-05	0.427958	0.0830994	0.400838
ESCA	3.35211e-09	0.00244704	0.866908	4.31426e-07	0.647941	0.0147958	0.0010643
GBM	6.24826e-06	0.0265311	0.0196622	0	0.0382736	0.025684	0.00278162
HNSC	0.000137753	0	0.285853	1.3906e-14	0.0600301	0.109101	0.0921242
KICH	0.383654	0.855248	0.0587469	0.0788319	0.00242522	0.633644	0.137587
KIRC	0.0111681	0.111134	0.0435505	0.267248	1.5193e-08	0.000764803	0.000104771
KIRP	0	2.96721e-05	2.13493e-06	0.000465933	2.10374e-09	0.000783223	0.0123723
LAML	4.99131e-11	0.443104	0.828662	0.0148535	0.451108	0.509078	0.671468
LGG	0	0.0119119	3.52791e-07	1.97763e-06	0.0340162	0.943001	2.12075e-07
LIHC	4.52392e-05	9.79358e-10	0.0963502	8.89231e-09	0.396205	7.81178e-07	0.486266
LUAD	7.62179e-15	2.29624e-06	0.000987943	5.54825e-11	0.0273487	6.30774e-09	0.000162257
LUSC	3.14937e-12	0.114885	0.155609	0	0.000219747	0.805522	0.00276271
MESO	0.794391	0.24357	0.0576369	0.124332	0.00911571	0.872188	0.233427
OV	3.34211e-07	0.895925	0.0668393	0.957188	0.00929519	0.586097	0.338206
PAAD	6.65054e-08	1.53322e-05	0.0350094	9.40356e-08	0.00611695	0.317602	0.00822959
PCPG	0.0548297	0.563597	9.8148e-06	5.04748e-07	0.266597	0.00118392	0.00949261
PRAD	0	0.776823	0.0054546	0	0	1.46661e-06	0
READ	4.02295e-09	0.418057	0.633769	0.192159	0.374799	0.391115	0.482129
SARC	0.00878185	3.49628e-11	0.00233059	0.0127909	0.676445	0.380554	2.01237e-06
SKCM	3.96051e-10	0.00041129	0.585481	0.261845	0.000601679	0.00717091	1.8335e-10
STAD	3.95197e-12	2.60756e-12	0.29655	5.34204e-15	0.0252382	0.0120437	1.55796e-05
TGCT	2.30854e-05	0.0596883	0	2.82216e-06	0	0.338215	4.49338e-05
THCA	0	0.019496	0.144404	2.26331e-05	0	0.975818	0.02934
THYM	0.897303	0.00407505	0.00491551	5.01179e-06	0.0592221	0.000924727	0.0148143
UCEC	3.25685e-16	5.05337e-09	0.194345	0.408275	1.7352e-11	0.135172	0.509351
UCS	0.164959	0.000195933	0.0583637	0.995397	0.433041	0.0964909	0.11186
UVM	0.0773985	0.161631	0.67224	0.76537	0.87076	0.98688	0.408483

## Sheet: DNAssCor.cor
CancerType	TRAF1	TRAF2	TRAF3	TRAF4	TRAF5	TRAF6	TRAF7
ACC	0.205478	0.128694	-0.26691	-0.149028	0.00130249	0.122017	-0.0100027
BLCA	-0.302422	-0.231407	-0.177599	0.19009	-0.0736533	-0.125826	0.0750883
BRCA	-0.0434327	0.0899505	-0.0341313	0.0504489	-0.0305427	-0.0684607	0.097873
CESC	-0.0893436	-0.144145	0.134376	-0.219992	-0.303116	0.0421672	0.180565
CHOL	-0.0640927	-0.173745	0.30991	0.032175	0.273616	0.2	0.329472
COAD	-0.0903169	0.074733	-0.151667	0.178468	0.0667621	-0.103646	0.167392
DLBC	-0.317955	-0.0771819	-0.0942249	0.433782	0.0191055	-0.0889058	0.233717
ESCA	-0.324672	-0.0710301	-0.0374604	0.0823567	-0.159419	-0.165959	0.180154
GBM	-0.19518	0.238383	0.126776	0.441772	0.143145	0.112567	0.354887
HNSC	-0.313785	-0.0547793	0.157963	0.187415	-0.0901935	0.021152	0.181316
KICH	-0.170696	0.293315	0.0392857	-0.247711	-0.480678	-0.195833	0.0640568
KIRC	-0.0187971	-0.00519616	0.0229935	-0.12317	0.0634518	0.0822812	-0.0344462
KIRP	0.19226	0.0243768	0.0747674	0.0953602	0.291208	-0.0450349	-0.20312
LAML	0.0244506	-0.102074	0.145023	-0.14131	-0.206617	-0.0369331	0.111962
LGG	0.343483	0.234336	-0.178854	0.026143	0.501969	-0.213061	0.215971
LIHC	-0.0116809	-0.0859633	-0.149887	0.0170918	-0.206593	-0.00781784	0.181475
LUAD	-0.197947	0.1802	0.13458	0.140994	-0.014409	-0.0108482	0.123602
LUSC	-0.314915	-0.103143	0.0554032	0.182523	-0.152224	0.069196	0.13721
MESO	-0.0678617	0.0285957	-0.177735	-0.225662	-0.122808	0.107901	0.0417095
OV	0.214286	0	0.392857	-0.75	-0.464286	-0.107143	-0.285714
PAAD	-0.212328	0.190523	0.0309589	0.141297	-0.11488	-0.0825813	0.245351
PCPG	0.431796	0.0443193	0.278324	-0.0685288	0.0105073	0.161841	-0.0896867
PRAD	0.270369	0.170638	0.127192	0.0274312	0.281124	-0.00410587	-0.00574221
READ	0.0250768	-0.020453	-0.0792038	0.308601	0.0241376	0.118564	-0.0939421
SARC	-0.205363	-0.0207193	0.128349	0.116514	-0.373363	-0.17579	0.153886
SKCM	-0.0653102	-0.0866336	-0.0342713	0.040056	-0.168517	-0.105628	0.115324
STAD	-0.313919	0.0891812	-0.131865	0.355338	-0.0912858	-0.15472	0.135551
TGCT	-0.104779	0.219793	-0.519928	-0.0967226	-0.43694	0.344188	0.460527
THCA	0.180191	-0.0978604	-0.13975	0.012225	0.274149	-0.177135	0.136002
THYM	0.210526	0.126563	0.498006	0.533813	-0.280779	-0.0674761	-0.0185444
UCEC	-0.0862673	-0.193541	-0.034217	-0.0184228	0.125956	0.109816	0.0206069
UCS	-0.0743677	0.0169515	0.0110048	-0.205537	0.295625	0.025769	-0.170472
UVM	-0.0222925	0.0657759	0.168565	0.196554	0.147281	0.284318	-0.128786

## Sheet: DNAssCor.pval
CancerType	TRAF1	TRAF2	TRAF3	TRAF4	TRAF5	TRAF6	TRAF7
ACC	0.0712117	0.260877	0.0184182	0.192441	0.991036	0.286585	0.930661
BLCA	6.65873e-10	2.76518e-06	0.000341085	0.000124394	0.139405	0.0114061	0.131845
BRCA	0.225896	0.0120394	0.341338	0.159486	0.394523	0.0561522	0.00627751
CESC	0.120652	0.012066	0.0193428	0.000117227	8.57968e-08	0.464384	0.00162339
CHOL	0.709508	0.309592	0.0662645	0.852031	0.106408	0.241225	0.0502735
COAD	0.125507	0.205123	0.00987641	0.00235569	0.25776	0.078572	0.00436646
DLBC	0.028092	0.601034	0.522945	0.00226224	0.897334	0.546762	0.109809
ESCA	3.10055e-05	0.371709	0.637805	0.300171	0.0441428	0.0360681	0.0227488
GBM	0.125126	0.060107	0.321268	0.000331724	0.262335	0.378805	0.00452549
HNSC	1.12539e-12	0.223204	0.000419888	2.74975e-05	0.0446994	0.638284	5.01365e-05
KICH	0.177067	0.0189779	0.757395	0.0486842	7.15376e-05	0.120802	0.614237
KIRC	0.741122	0.927241	0.686113	0.0299372	0.264432	0.147644	0.544843
KIRP	0.00152902	0.689892	0.220586	0.117957	1.25562e-06	0.460916	0.000805309
LAML	0.767759	0.216757	0.0786621	0.0866888	0.0118698	0.655492	0.175291
LGG	7.79542e-16	6.45594e-08	4.00635e-05	0.550693	0	9.31547e-07	6.56454e-07
LIHC	0.822727	0.0987251	0.00388703	0.743039	6.46206e-05	0.880809	0.000460399
LUAD	2.28478e-05	0.000117981	0.00413699	0.00265394	0.759632	0.81782	0.00848424
LUSC	1.0467e-09	0.0496096	0.29231	0.000483746	0.00367753	0.188287	0.0088994
MESO	0.534004	0.793458	0.10155	0.0369041	0.259423	0.322071	0.702462
OV	0.661508	1	0.395635	0.0662698	0.302381	0.839683	0.555952
PAAD	0.00788976	0.0173219	0.700929	0.0785222	0.153135	0.305057	0.00207547
PCPG	1.68452e-09	0.552121	0.000150671	0.357646	0.887945	0.0291544	0.228345
PRAD	1.27227e-09	0.000145924	0.00474527	0.543709	2.61282e-10	0.927593	0.898869
READ	0.810092	0.844628	0.447281	0.00257933	0.81708	0.254565	0.367153
SARC	0.00092693	0.740312	0.0394471	0.0616872	7.94639e-10	0.0046749	0.0134102
SKCM	0.156975	0.0603027	0.457937	0.385612	0.000243575	0.0219027	0.0122982
STAD	4.91884e-09	0.102686	0.0156301	2.65778e-11	0.0947998	0.00451094	0.0129378
TGCT	0.194239	0.00608884	0	0.230935	1.86874e-08	1.31306e-05	2.48532e-09
THCA	4.78137e-05	0.0279148	0.0016576	0.783972	4.38784e-10	6.43509e-05	0.00220896
THYM	0.0217148	0.169966	1.31059e-08	5.41041e-10	0.00205214	0.465376	0.841133
UCEC	0.078838	7.31198e-05	0.486273	0.707803	0.010165	0.0251434	0.675033
UCS	0.584988	0.901184	0.935826	0.128407	0.0273336	0.850174	0.208474
UVM	0.844122	0.561393	0.134815	0.0806106	0.191941	0.0108126	0.25434
