# Supplementary material for: Pan-cancer analysis of the TRAF family genes and their correlation with prognosis, TME, immune and drug sensitivity
Source: Eur J Med Res. 2024 Jun 2;29:307. doi: 10.1186/s40001-024-01875-8 (PMC11145793; doi:10.1186/s40001-024-01875-8)
Supplement: Supplementary file 6 — Supplementary Material 6: Table S4: Correlation coefficients and p values for the drug sensitivity analysis of TRAF family genes [file 40001_2024_1875_MOESM6_ESM.xlsx]

## Sheet: Sheet1
Gene	Drug	cor	pvalue
TRAF5	PX-316	0.494066	6.02394e-05
TRAF1	METHOTREXATE	-0.413543	0.00102251
TRAF6	PX-316	0.39928	0.00157598
TRAF2	Gemcitabine	0.3779	0.00291211
TRAF2	Mithramycin	-0.371934	0.00343186
TRAF1	Fluorouracil	-0.354742	0.00541772
TRAF1	malacid	-0.351187	0.00593622
TRAF2	Triapine	0.33022	0.00997218
TRAF7	Floxuridine	0.328083	0.0104936
TRAF2	Floxuridine	0.326197	0.0109733
TRAF5	Dexrazoxane	0.325212	0.0112311
TRAF2	Fludarabine	0.323753	0.0116231
TRAF2	6-THIOGUANINE	0.320479	0.0125451
TRAF5	HYPOTHEMYCIN	0.319874	0.0127223
TRAF2	Depsipeptide	-0.319744	0.0127607
TRAF2	Acrichine	0.31336	0.0147702
TRAF2	Asparaginase	0.307145	0.016982
TRAF1	Midostaurin	0.301806	0.0191018
TRAF2	8-Chloro-adenosine	0.29761	0.0209225
TRAF3	Fludarabine	0.295722	0.0217884
TRAF2	Cytarabine	0.284976	0.0273169
TRAF1	RAPAMYCIN	0.284387	0.0276511
TRAF1	TRIMETREXATE GLUCURONATE	-0.280771	0.0297795
TRAF2	Chlorambucil	0.267924	0.0384821
TRAF6	Denileukin Diftitox Ontak	-0.263965	0.0415544
TRAF2	Eribulin mesilate	-0.26151	0.0435591
TRAF2	Camptothecin	0.260445	0.0444531
TRAF3	Fluorouracil	-0.260334	0.044547
TRAF2	Hydroxyurea	0.260085	0.0447586
TRAF2	Triethylenemelamine	0.255849	0.0484864
