# Supplementary material for: Pan-cancer analysis of the TRAF family genes and their correlation with prognosis, TME, immune and drug sensitivity
Source: Eur J Med Res. 2024 Jun 2;29:307. doi: 10.1186/s40001-024-01875-8 (PMC11145793; doi:10.1186/s40001-024-01875-8)
Supplement: Supplementary file 7 — Supplementary material 7: Table S5: Sequences of primers and siRNAs used in this study [file 40001_2024_1875_MOESM7_ESM.xlsx]

## Sheet: Sheet1
Primers	sequences(5'to3')
TRAF1-F	TCCTGTGGAAGATCACCAATGT
TRAF1-R	GCAGGCACAACTTGTAGCC
TRAF2-F	CCTTCCCAGATAATGCTGCCC
TRAF2-R	GCTCTCGTATTCTTTCAGGGTC
TRAF3-F	TCTTGAGGAAAGACCTGCGAG
TRAF3-R	GCGATCATCGGAACCTGACT
TRAF4-F	TATTGGGCCTGCCTATCCG
TRAF4-R	CAAAACTCGCACTTGAGGCG
TRAF5-F	GACCTGAAAGAGCATTTGAGTGC
TRAF5-R	AGTGCTTAAAAGGACAGTCTTGC
TRAF6-F	TTTGCTCTTATGGATTGTCCCC
TRAF6-R	CATTGATGCAGCACAGTTGTC
TRAF7-F	GAGTGCGAGCACATCAAATGC
TRAF7-R	TGGGTCTCGTAAGTGTCCTGG
TRAF6 si-1	GCCACGGGAAATATGTAATAT
TRAF6 si-2	CGGAATTTCCAGGAAACTATT
TRAF6 si-3	CGAAGAGATAATGGATGCCAA
